# Supplementary material
Source: publisher figshare collection journal article supplement (https://springernature.figshare.com/ndownloader/files/16847318)
Supplement: Supplementary file 1 [file 16847318]

Top Canonical Pathways

| Name                           | p-value  | Overlap     |
|--------------------------------|----------|-------------|
| LXR/RXR Activation             | 2.79E-11 | 6.6 % 8/121 |
| FXR/RXR Activation             | 1.84E-09 | 5.6 % 7/126 |
| Acute Phase Response Signaling | 1.25E-05 | 2.8 % 5/176 |
| Complement System              | 3.53E-05 | 8.1 % 3/37  |
| Atherosclerosis Signaling      | 2.05E-02 | 1.6 % 2/128 |

Top Networks

| ID | Associated Network Functions                                                                                                   | Score |
|----|--------------------------------------------------------------------------------------------------------------------------------|-------|
| 1  | Dermatological Diseases and Conditions, Developmental Disorder, Hereditary Disorder                                            | 41    |
| 2  | Cell-To-Cell Signaling and Interaction, Hematological System Development and Function, Immune Cell Trafficking                 | 21    |
| 3  | Endocrine System Disorders, Organismal Injury and Abnormalities, Cellular Compromise                                           | 21    |
| 4  | Cell-To-Cell Signaling and Interaction, Skeletal and Muscular Disorders, Skeletal and Muscular System Development and Function | 3     |
